# Supplementary material
Source: publisher figshare collection journal article supplement (https://acs.figshare.com/ndownloader/files/5070574)
Supplement: Supplementary file 1 [file 5070574]

## Supplementary Information.

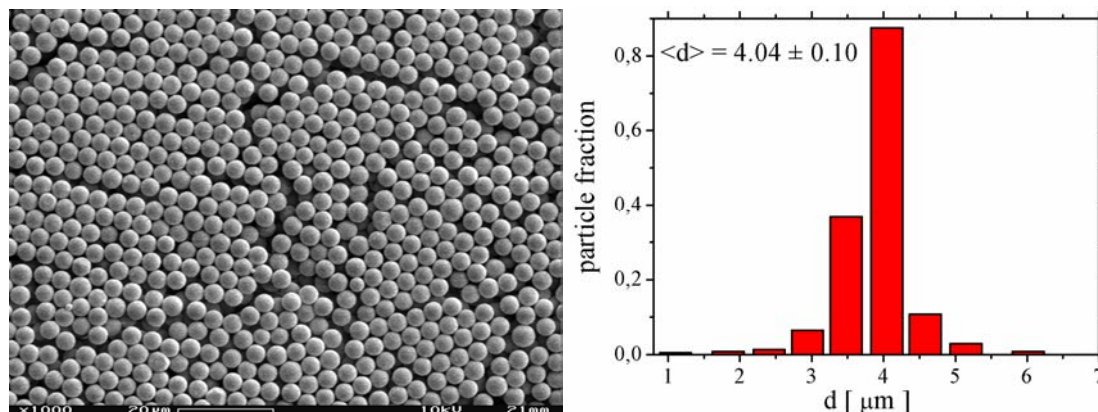

**Fig. A:** SEM image of the PMMA particles used as core. The diagram on the right side of the image show the size distributions of the particles.

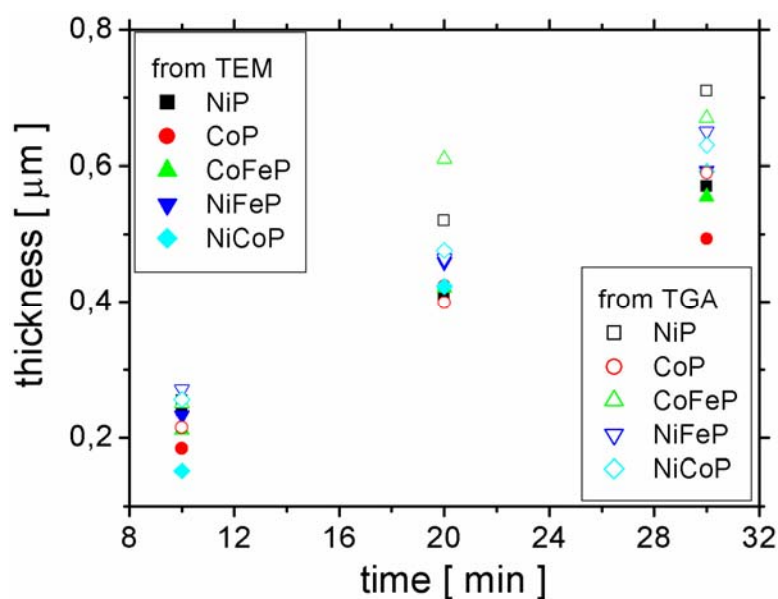

**Fig.B:** Diagram of the metallic thickness in function of the plating time for all the coated microspheres. There are in the diagram two kind of points: the filled one (legend on the left) refer to the calculated thickness from the TEM images, while the hollow (legend on the right) were obtained from TGA measurements.

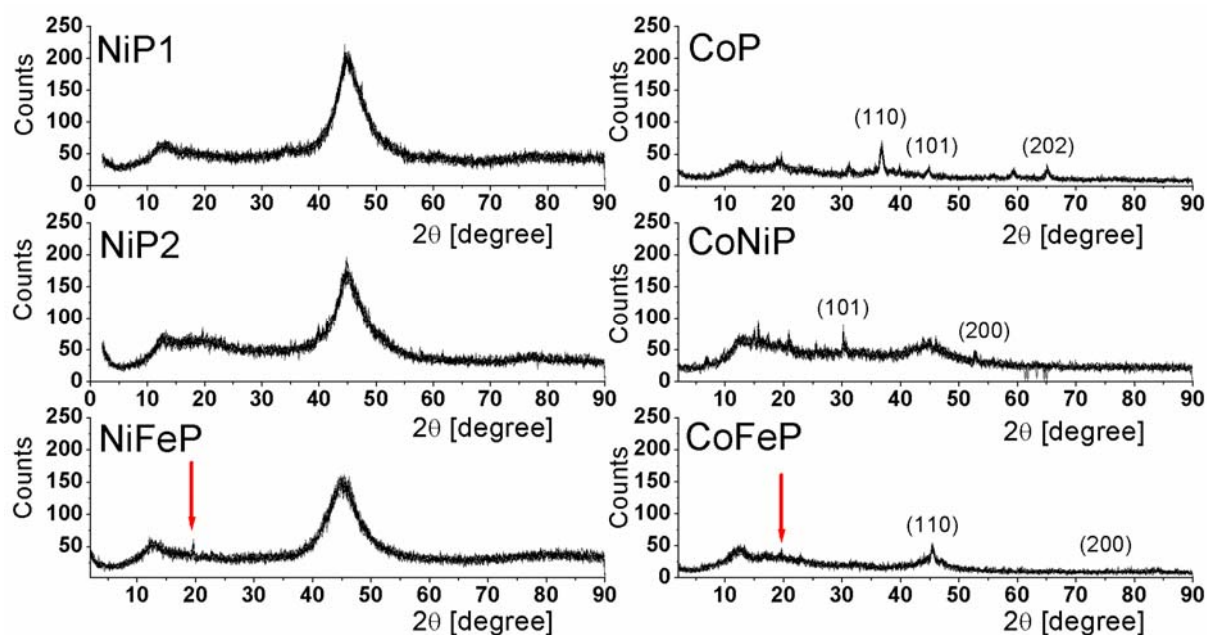

**Fig.C:** XRD pattern for all the coated microspheres. The diagram were obtain from a dry powder of particles at T=300 K. The arrow in red indicate the expected position of the major peak corresponding to the  $\alpha\text{Fe}_3\text{O}_4$  phase.

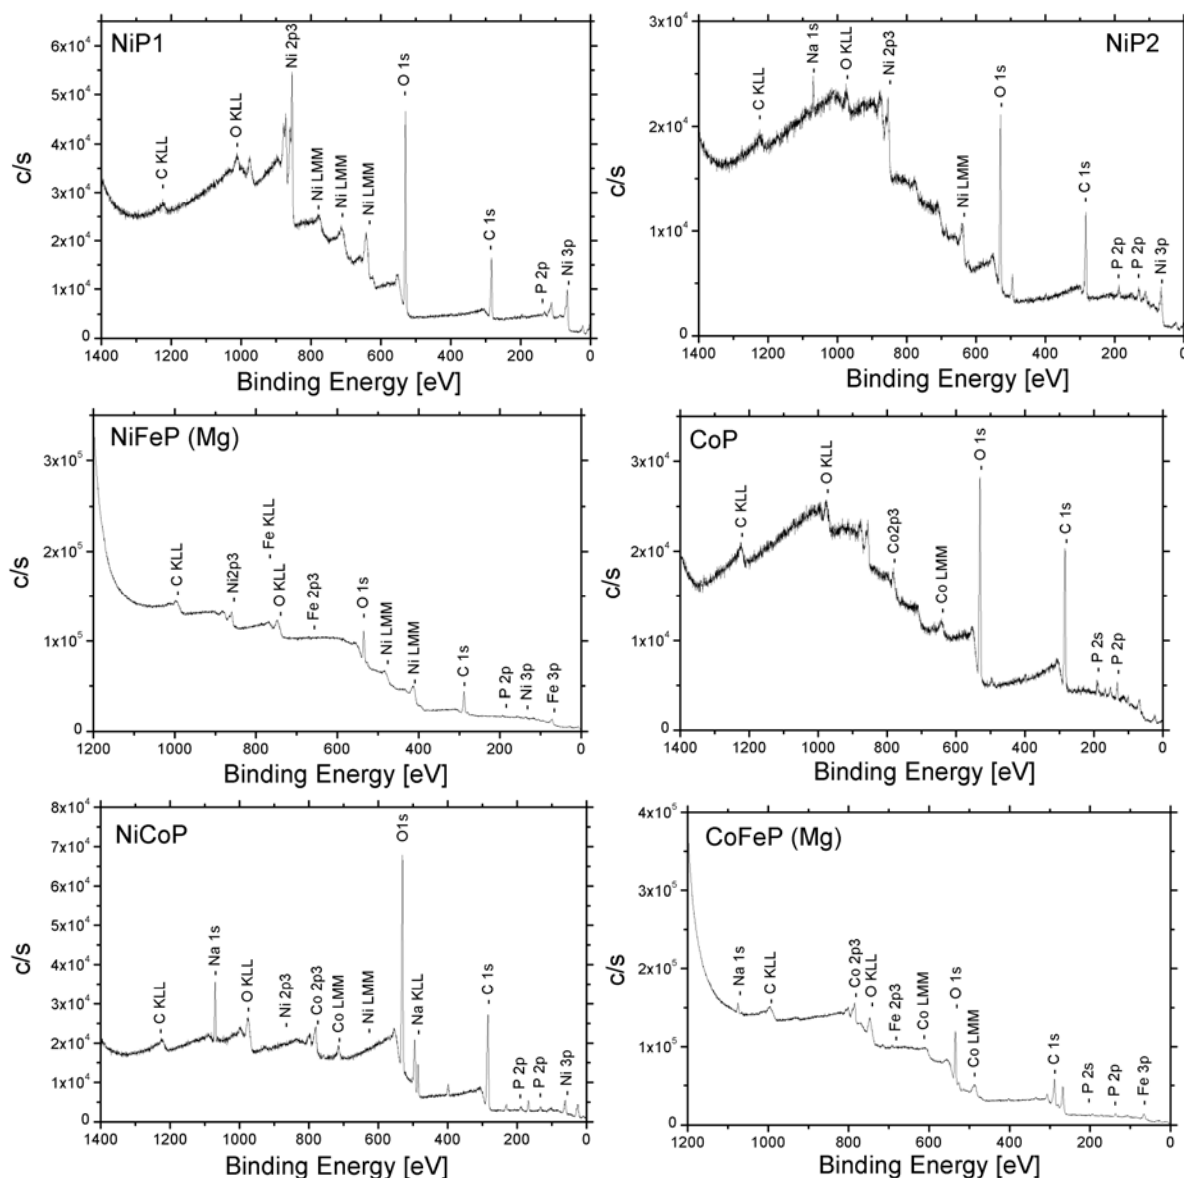

**Fig.D:** XPS spectra obtained from a dry powder of the the coated microspheres. For all the samples AlK $\alpha$  monochromatic radiation was used (250.0 W, 187.85 eV), while for the NiFeP and CoFeP samples was used also a MgK $\alpha$  radiation (250.0 W, 187.85 eV) in order to better identify the Fe peaks.
